# Supplementary material for: OsCRP1, a Ribonucleoprotein Gene, Regulates Chloroplast mRNA Stability That Confers Drought and Cold Tolerance
Source: PubMed Central journal article supplement (PMC7915912; doi:10.3390/ijms22041673), 2021-02-07
Supplement: ijms-22-01673-s001.pdf [file ijms-22-01673-s001.pdf]

## Supporting information

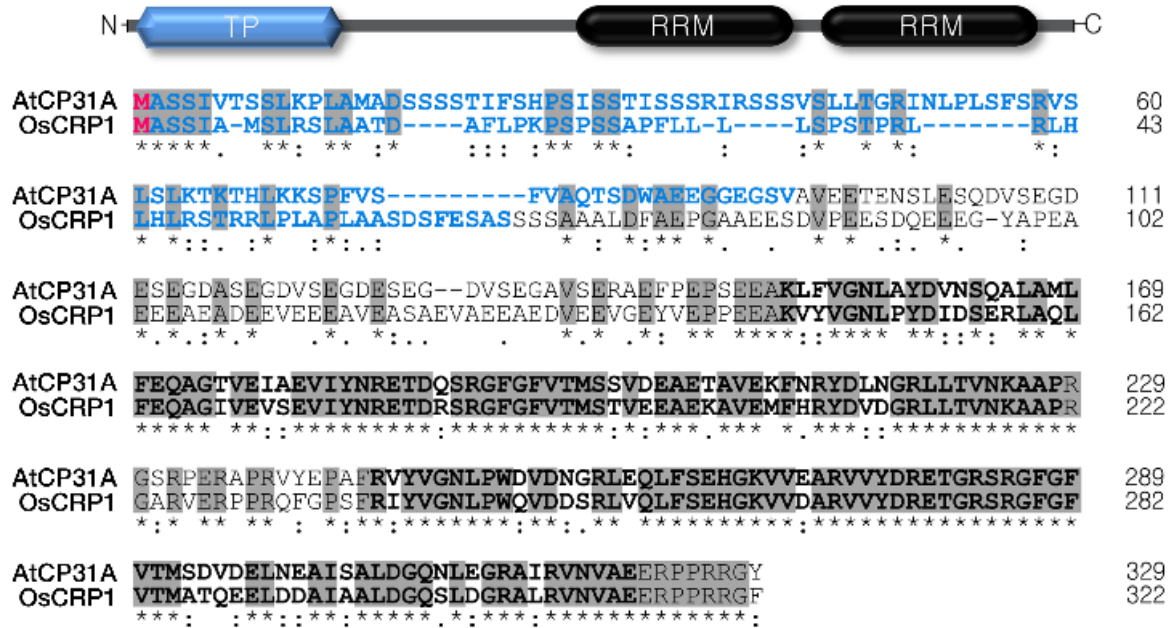

**Figure S1.** Survey of the conserved motifs of OsCRP1 through alignment with AtCP31A (At4G24770). The alignment was performed with Clustal Omega tool from EMBL-EBI (McWilliam et al. 2013). Blue diamond-shaped box and same color bold letters indicate transit peptide, black ovoid-shaped boxes, and same color bold letters represent RRM (RNA recognition motifs, accession number cd12399) domains. N, amino-terminus, C, carboxyl-terminus, asterisk (\*), fully conserved residue that is filled with grey, colon (:), conservation between groups of strongly similar properties (scoring > 0.5 in the Gonnet PAM 250 matrix), period (.), conservation between groups of weakly similar properties (scoring ≤ 0.5).

### Transient expression in protoplast

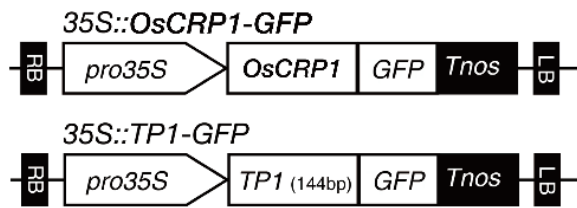

### Protein localization and RIP assay in rice

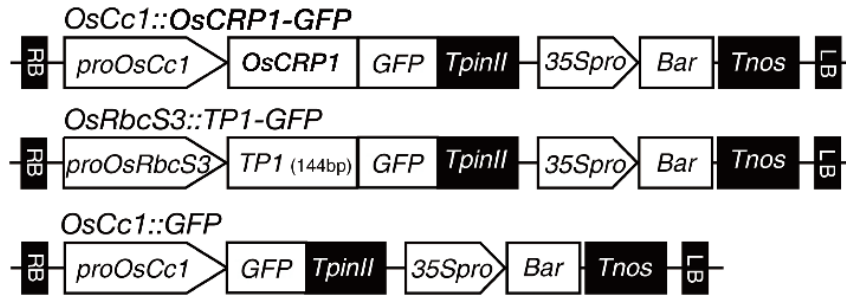

### Overexpression constructs

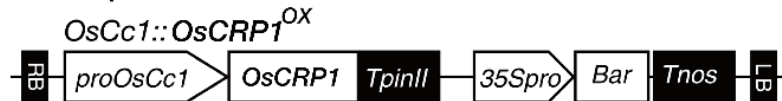

### RNAi construct

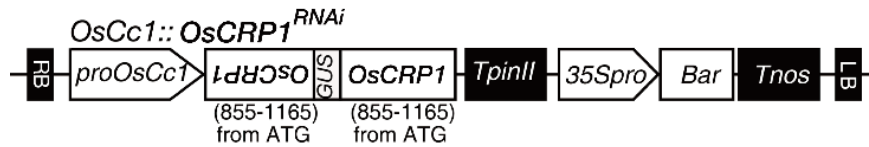

**Figure S2.** Vectors used in this study.

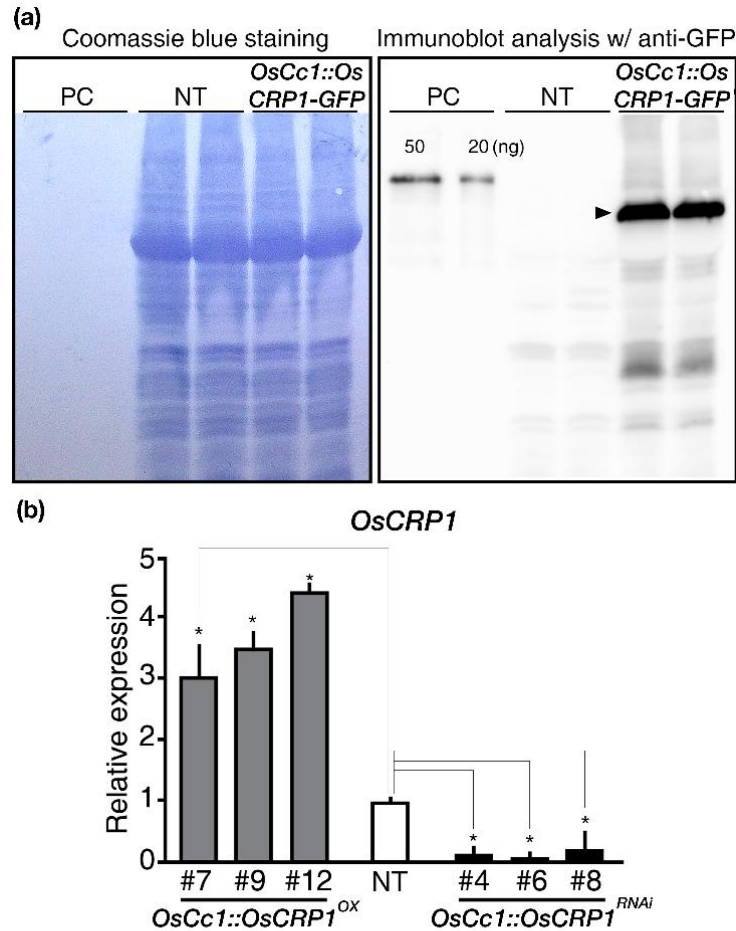

**Figure S3.** Protein and transcript levels in *OsCRP1* transgenic plants. A, Levels of *OsCRP1*-green fluorescent protein (GFP) fusion protein in *OsCc1::OsCRP1-GFP* plants as determined by immunoblot analysis using  $\alpha$ -GFP antibody. Fifteen  $\mu$ g of total soluble protein was separated by SDS-PAGE in duplicates. Arrowhead indicates *OsCRP1*-GFP at the expected size (55 kDa). The protein loading is shown by CBB (Coomassie Brilliant Blue) staining in the lower panel. The PC (positive control) (PolyTag-GFP, Shanghai Genomics, China) is 74 kDa. B, Expression level of *OsCRP1* in lines chosen for further study. Total RNAs extracted from two-week-old rice leaves were used for qRT-PCR analysis. All the values were normalized to the internal *OsUbi1* control gene, and data bars represent the mean  $\pm$  SD of two biological replicates, each of which had three technical replicates. Values for the non-transgenic (NT) samples were set as 1.0 for normalization.

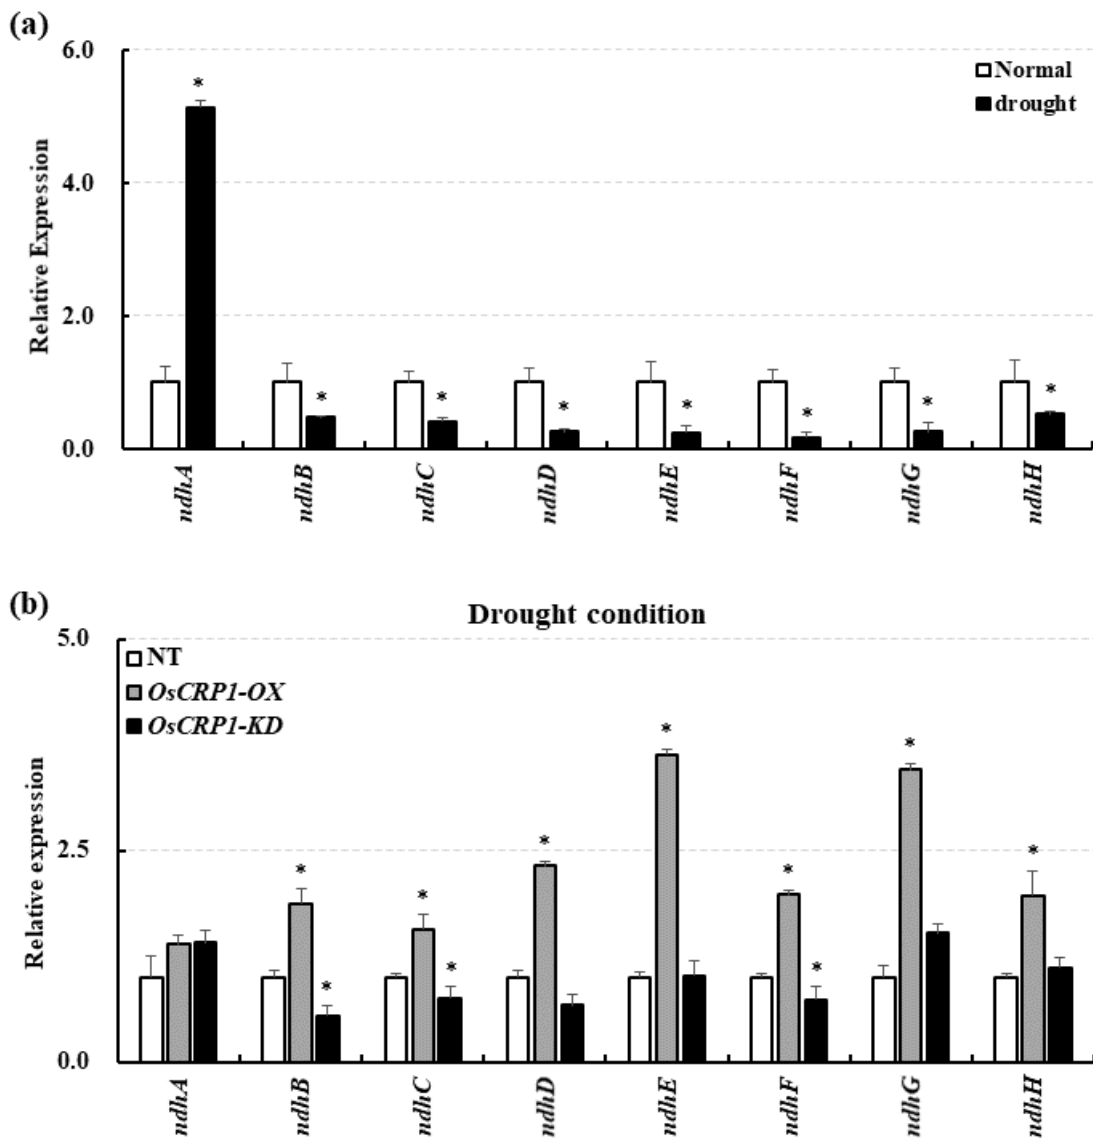

**Figure S4.** Relative expression levels of *ndh* genes after drought treatment. A, Transcription level of *ndh* genes in the non-transgenic (NT) plant after drought treatment (3h air-drying). Values for the Normal (without treatment) samples were set as 1.0 for normalization. Asterisks indicate significant differences compared with Normal ( $P < 0.05$ , t-test) B. Transcription level of *ndh* genes in NT and transgenic plants (*OsCRP1* overexpressing and knock-down) after drought treatment (3h air-drying). Total RNAs extracted from two-week-old rice leaves were used for qRT-PCR analysis. All the values were normalized to the internal *OsUbi1* control gene, and data bars represent the mean  $\pm$  SD of three bio-logical replicates, each of which had three technical replicates. Values for the NT samples were set as 1.0 for normalization. Asterisks indicate significant differences compared with NT ( $P < 0.05$ , One-way ANOVA)

**Table S1** List of primers used in this study.

| Target Gene   |              | Primer Sequence                                   |                                                    |
|---------------|--------------|---------------------------------------------------|----------------------------------------------------|
|               |              | Forward                                           | Reverse                                            |
| <i>OsCRP1</i> | Cloning      | 5'-TATACAGAGGAGACTCGATTGA-3'                      | 5'-TACATACACAGCTGATGTTGAC-3'                       |
| <i>gfp</i>    | Cloning      | 5'-CAGCACGACTTCTTCAAGTCC-3'                       | 5'-CTTCAGCTCGATGCGGTTTAC-3'                        |
| <i>OsCRP1</i> | Localization | 5'-TTGCTCCGTGGATCCTCGATGGCC<br>TCC TCCATCGCCAT-3' | 5'-AAAGCGGCCGCAAATAAAGCCTCG<br>G CGCGGTGGTCGCTC-3' |
| <i>OsUbi1</i> | qRT-PCR      | 5'-ATGGAGCTGCTGCTGTTCTA-3'                        | 5'-TTCTTCCATGCTGCTCTACC-3'                         |
| <i>OsCRP1</i> | qRT-PCR      | 5'-CAGCTGTTTACGCGAGCATGG-3'                       | 5'-CGCTCCTCTGCAACATTCAC-3'                         |
| <i>ndhA</i>   | qRT-PCR      | 5'-CGAGCTGCCGCTCAATCTAT-3'                        | 5'-AGGCTGACGCCAAAGATTCC-3'                         |
| <i>ndhB</i>   | qRT-PCR      | 5'-TACGAAGGATCCCCACTCC-3'                         | 5'-TCCAGAAGAAGATGCCATTCTG-3'                       |
| <i>ndhC</i>   | qRT-PCR      | 5'-GCCCAAGGGTAGAGAAAAGACC-3'                      | 5'-TTAGTCCGGTTCGTGAAGG-3'                          |
| <i>ndhD</i>   | qRT-PCR      | 5'-GCTTCCCCATGGGTATCTGG-3'                        | 5'-ACGGTCCAACGAACCAAGA-3'                          |
| <i>ndhE</i>   | qRT-PCR      | 5'-AGCCGCAAGGGCTATAACAA-3'                        | 5'-TGATCACAAGCCGAAACATGG-3'                        |
| <i>ndhF</i>   | qRT-PCR      | 5'-CGCAGTTTTTCGACAAGGGT-3'                        | 5'-GACGAAATTCGACCTCCCC-3'                          |
| <i>ndhG</i>   | qRT-PCR      | 5'-GTTGTGCCACAGCTACAAAGT-3'                       | 5'-GGGGTCTAGGGGTGGTATT-3'                          |
| <i>ndhH</i>   | qRT-PCR      | 5'-ATAAGGCAGATCGGCAGCAA-3'                        | 5'-TTATGGCAGATCTCGGTGCG-3'                         |
| <i>psaA</i>   | qRT-PCR      | 5'- AGTAGCAGTAGGCGGCAAAG -3'                      | 5'- ACGGGAAGTGCAGCAAATA -3'                        |
| <i>psaB</i>   | qRT-PCR      | 5'- TGGACATCTTGTGGGCGA -3'                        | 5'- GAGCCACGGGCTTATCTCTC -3'                       |
| <i>psaC</i>   | qRT-PCR      | 5'- AAGATAGAGCCATGCTGCGG -3'                      | 5'- ACCGAAGATTGTGTGGGTTGT -3'                      |
| <i>psbB</i>   | qRT-PCR      | 5'- ACACATTTGGCATGGGGCTA -3'                      | 5'- ACTGGCTGTCTCCCTGTAGT -3'                       |
| <i>psbC</i>   | qRT-PCR      | 5'- AATGTGGGATCTGCCAAAGG -3'                      | 5'- CACGAAGGTCCCAAAAACGC -3'                       |
| <i>psbD</i>   | qRT-PCR      | 5'- GGCAACCGTGAAAACACTC -3'                       | 5'- AAAGCGATTAGCGGTGACCA -3'                       |
| <i>psbE</i>   | qRT-PCR      | 5'- ACGGAATCCTTGTGCGCTT -3'                       | 5'- CCCTATTCATTGCGGGTTGG -3'                       |
| <i>psbF</i>   | qRT-PCR      | 5'- CGTTGGATGAACTGCATTGCT -3'                     | 5'- TTTTACAGTGCATGGCTGG -3'                        |
| <i>psbG</i>   | qRT-PCR      | 5'- CCGCTGCGCTAGGACTTGAT -3'                      | 5'- AGACTCTCTAGTTTATGGCCCT -3'                     |
| <i>psbH</i>   | qRT-PCR      | 5'- CCAAGACAACTCGCGTAGG -3'                       | 5'- CGCGAATAAAGCCATTGCGA -3'                       |
| <i>psbK</i>   | qRT-PCR      | 5'- TTTCTTCGCCAAATTGCCCG -3'                      | 5'- CAGCTTGCCAAACAAAGGCT -3'                       |
| <i>atpA</i>   | qRT-PCR      | 5'- TGAATCTCCTGCTCCGGGTA -3'                      | 5'- GCTGTTTTGCCGTTTGTCT -3'                        |
| <i>atpB</i>   | qRT-PCR      | 5'- CCTTATCGGCGTGGAGGAAA -3'                      | 5'- CCCCTACTCCGCCAAATACG -3'                       |
| <i>atpE</i>   | qRT-PCR      | 5'-TGTTAATGGGGCGTGGTTT-3'                         | 5'-TGACTCCTAAGCGAATTATTGGG-3'                      |
| <i>atpF</i>   | qRT-PCR      | 5'-CCGACAACGGGTTTTCCAAC-3'                        | 5'-ATTCCATGGCCCCGAGAATG-3'                         |

**Table S2** List of chloroplast genes in *OsCRPI* overexpression and knock-down compared with non-transgenic plants based on the RNA-seq data

| <b>Description</b> | OX/NT<br>fold change | OX/NT<br>p-values | RNAi/NT<br>fold change | RNAi/NT<br>p-values |
|--------------------|----------------------|-------------------|------------------------|---------------------|
| psaA               | 0.91                 | 0.518             | 0.73                   | 0.030               |
| psaB               | 0.96                 | 0.746             | 0.81                   | 0.244               |
| psaC               | 0.60                 | 0.006             | 0.78                   | 0.239               |
| psbB               | 1.09                 | 0.400             | 1.08                   | 0.581               |
| psbC               | 1.00                 | 0.990             | 1.01                   | 0.956               |
| psbD               | 1.18                 | 0.345             | 0.90                   | 0.510               |
| psbE               | 0.84                 | 0.574             | 1.34                   | 0.393               |
| psbF               | 0.84                 | 0.459             | 1.23                   | 0.433               |
| psbG               | 1.07                 | 0.251             | 0.98                   | 0.238               |
| psbH               | 1.30                 | 0.426             | 0.86                   | 0.651               |
| psbK               | 0.39                 | 0.112             | 0.29                   | 0.045               |
| atpA               | 1.60                 | 0.036             | 0.51                   | 0.022               |
| atpB               | 4.33                 | 0.055             | 1.52                   | 0.265               |
| atpE               | 2.70                 | 0.106             | 0.36                   | 0.193               |
| atpF               | 1.10                 | 0.411             | 0.64                   | 0.021               |
| ndhA               | 5.37                 | 0.049             | 1.17                   | 0.918               |
| ndhB               | 2.16                 | 0.039             | 0.61                   | 0.050               |
| ndhC               | 1.21                 | 0.230             | 0.59                   | 0.019               |
| ndhD               | 1.68                 | 0.298             | 0.65                   | 0.036               |
| ndhE               | 4.28                 | 0.025             | 0.37                   | 0.023               |
| ndhF               | 1.50                 | 0.179             | 0.13                   | 0.029               |
| ndhG               | 1.70                 | 0.382             | 0.25                   | 0.025               |
| ndhH               | 1.90                 | 0.196             | 0.91                   | 0.903               |
